# Supplementary material for: Design of cross-reactive antigens with machine learning and high-throughput experimental evaluation
Source: Frontiers journal article supplement (doi:10.3389/fbinf.2025.1580967), 2025-07-16
Supplement: Data_Sheet_3.pdf [file Data_Sheet_3.pdf]

Figure S1

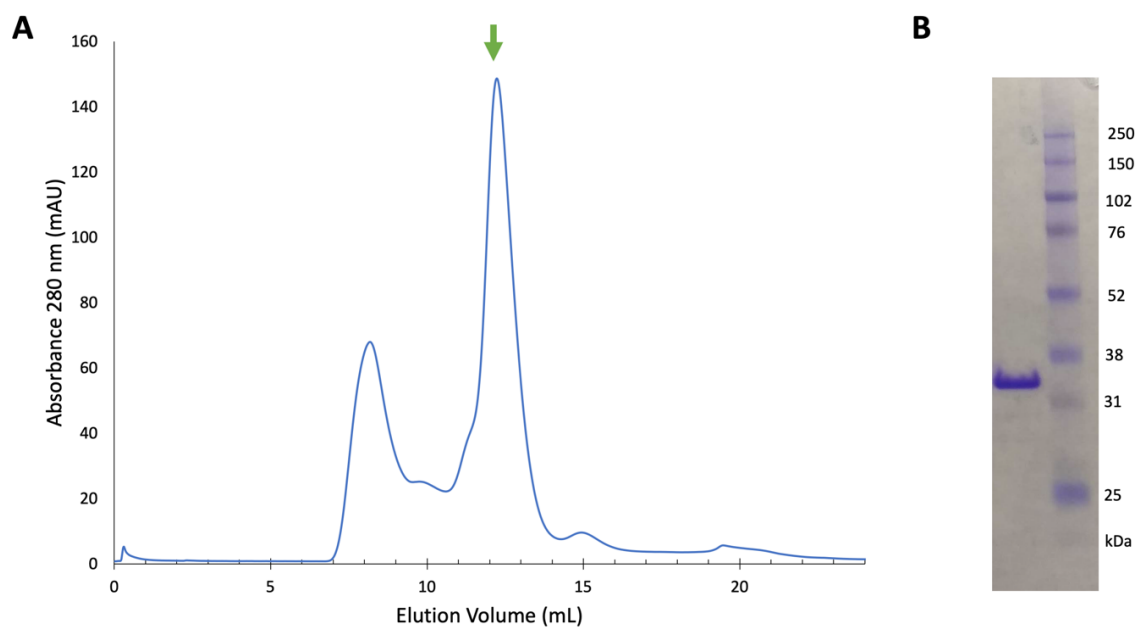

**Fig S1: fHbp protein quality.** (A) Size exclusion chromatography trace of fHbp m002416 collected during protein purification. (B) SDS-PAGE analysis of purified protein collected from the peak of the SEC trac.
