# Supplementary material for: Design of cross-reactive antigens with machine learning and high-throughput experimental evaluation
Source: Front Bioinform. 2025 Jul 16;5:1580967. doi: 10.3389/fbinf.2025.1580967 (PMC12319226; doi:10.3389/fbinf.2025.1580967)
Supplement: Supplementary file 1 [file Table2.xlsx]

## Sheet: Round1
					Poor data - do not overinterpert the < 1 pMole				Response = Maximum signal from the highest concentration tested.
Construct	Concentration (µg/mL)	Antibody	Response	KD (M)	KD Error	kon(1/Ms)	kon Error	kdis(1/s)	kdis Error	Full X^2	Full R^2
v1.1 Control (0001)	411	JAR5	0.1756	2.373e-10	5.89e-12	1260000	9091	0.0002989	7.1e-06	0.0348	0.9943
v3.28 Control (0002)	134.6	JAR5	n/a	No Binding
0003	159.5	JAR5	0.1785	2.352e-10	6.707e-12	856600	4828	0.0002015	5.632e-06	0.0164	0.9947
0004	625.5	JAR5	0.1778	3.05e-10	5.92e-12	947000	5140	0.000289	5.38e-06	0.0271	0.9974
0005	Too Low	JAR5
0006	120	JAR5	0.1991	<1.0E-12	3.256e-11	641500	18800	<1.0E-07		0.1416	0.9777
0007	198.5	JAR5	0.1659	4.766e-09	1.171e-10	239300	4613	0.001141	1.737e-05	0.0445	0.9775
0008	16.1	JAR5	0.1434	2.259e-10	2.176e-11	868000	21690	0.000196	1.824e-05	0.0295	0.9774
0009	22.5	JAR5	0.1312	<1.0E-12	2.951e-11	647800	18380	<1.0E-07		0.0877	0.982
0010	276.9	JAR5	0.0974	1.44e-07	1.079e-08	410200	30000	0.05908	0.0009585	0.0196	0.983
0014	410	JAR5	0.1923	2.113e-10	4.187e-12	1322000	6980	0.0002794	5.336e-06	0.0182	0.9972
0012	474.3	JAR5	0.1917	4.182e-10	3.881e-12	1564000	7735	0.0006543	5.138e-06	0.0187	0.9968
0024	145	JAR5	n/a	No Binding
0022	61.1	JAR5	n/a	No Binding
0021	104.3	JAR5	n/a	No Binding
0017	79.1	JAR5	0.1637	2.97e-11	1.305e-11	674200	6517	2.002e-05	8.795e-06	0.0355	0.9951
0018	69.6	JAR5	0.1605	4.036e-10	1.109e-11	689400	5338	0.0002782	7.339e-06	0.0164	0.9977
0019	121.2	JAR5	0.1687	2.54e-10	4.768e-12	937000	4104	0.000238	4.344e-06	0.0137	0.9981
0015	191.7	JAR5	0.1613	2.091e-10	1.453e-11	768800	9299	0.0001608	1.1e-05	0.0629	0.9909
0016	160	JAR5	0.1125	5.314e-08	1.375e-09	124900	3160	0.00664	3.596e-05	0.031	0.9835
0027	350.9	JAR5	0.0833	6.688e-10	1.864e-10	7324000	2025000	0.004898	0.0001729	0.1562	0.605
0033	Too Low	JAR5
0042	120.5	JAR5	0.1449	<1.0E-12	8.17e-11	167000	5020	<1.0E-07		0.0161	0.9888
0044	0	JAR5
0040	79.5	JAR5	0.125	<1.0E-12	5.45e-11	481000	24700	<1.0E-07		0.1523	0.9801
0038	Too Low	JAR5
0034	16.7	JAR5	0.1545	<1.0E-12	1.776e-11	926700	35500	<1.0E-07		0.0488	0.9868
0041	Too Low	JAR5
0032	Too Low	JAR5
0036	9.97	JAR5	0.1414	6.543e-09	1.21e-10	562900	9910	0.003683	2.085e-05	0.0332	0.9818
0048	35.5	JAR5	0.1404	<1.0E-12	8.99e-11	279000	14270	<1.0E-07		0.1906	0.971
0057	31.6	JAR5	0.1479	<1.0E-12	3.286e-11	431200	9635	<1.0E-07		0.0534	0.9887
0058	56.7	JAR5	0.1391	<1.0E-12	2.517e-11	574500	11510	<1.0E-07		0.0526	0.9884
0059	26.9	JAR5	0.1309	<1.0E-12	3.26e-11	391000	9295	<1.0E-07		0.0226	0.9902
0052	48.3	JAR5	0.1348	7.763e-10	1.286e-11	759900	7208	0.0005899	8.009e-06	0.0079	0.995
0060	45.9	JAR5	0.1379	2.263e-10	6.662e-12	876200	5717	0.0001983	5.692e-06	0.0056	0.9977
0056	148.7	JAR5	0.1589	<1.0E-12	1.538e-11	795400	16700	<1.0E-07		0.0341	0.9916
0049	0	JAR5
0050	50.4	JAR5	0.1208	3.262e-06	1.393e-05	11750	50160	0.03834	0.001005	0.0662	0.9447
0055	0	JAR5
0051	52.7	JAR5	0.1677	5.539e-10	1.266e-11	604400	4578	0.0003348	7.218e-06	0.0225	0.9939
0054	42.8	JAR5	0.147	5.575e-11	1.515e-11	599700	8275	3.343e-05	9.072e-06	0.0139	0.9955
0079	44.4	JAR5	0.1558	3.045e-10	1.449e-11	671500	8672	0.0002045	9.362e-06	0.0236	0.9952
0078	14.1	JAR5	0.1256	<1.0E-12	5.895e-11	248700	34180	<1.0E-07		0.0259	0.991
0080	Too Low	JAR5
0096	10.9	JAR5	0.1126	<1.0E-12	3.777e-11	559200	33310	<1.0E-07		0.0522	0.9841
0095	24.8	JAR5	0.1585	2.25e-10	2.222e-11	459300	13100	0.0001034	9.771e-06	0.0096	0.9961
0103	9.88	JAR5	n/a	No Binding
0094	10.3	JAR5	0.144	<1.0E-12	2.244e-11	779100	20370	<1.0E-07		0.0981	0.9787
0107	15.9	JAR5	0.1701	2.216e-10	1.035e-11	1050000	14150	0.0002325	1.04e-05	0.035	0.9938
v1.1 Control (0001)	411	12C1	0.0833	<1.0E-12	2.255e-11	795500	15600	<1.0E-07		0.0473	0.9743
v3.28 Control (0002)	134.6	12C1	n/a	No Binding
0003	159.5	12C1	0.1025	<1.0E-12	3.489e-11	497000	9353	<1.0E-07		0.0552	0.9768
0004	625.5	12C1	n/a	No Binding
0005	Too Low	12C1
0006	120	12C1	n/a	No Binding
0007	198.5	12C1	n/a	No Binding
0008	16.1	12C1	0.0541	<1.0E-12	4.511e-10	166300	78560	<1.0E-07		0.1679	0.8394
0009	22.5	12C1	n/a	No Binding
0010	276.9	12C1	n/a	No Binding
0014	410	12C1	0.0896	<1.0E-12	1.801e-11	808900	12520	<1.0E-07		0.0294	0.9852
0012	474.3	12C1	0.0874	<1.0E-12	3.908e-11	599000	21390	<1.0E-07		0.0472	0.9698
0024	145	12C1	n/a	No Binding
0022	61.1	12C1	n/a	No Binding
0021	104.3	12C1	n/a	No Binding
0017	79.1	12C1	0.0767	<1.0E-12	5.574e-11	359300	10900	<1.0E-07		0.0329	0.979
0018	69.6	12C1	0.0706	<1.0E-12	5.659e-11	397300	13150	<1.0E-07		0.0282	0.98
0019	121.2	12C1	0.0887	3.756e-11	1.608e-11	585200	6100	2.198e-05	9.408e-06	0.0156	0.9929
0015	191.7	12C1	0.0761	<1.0E-12	1.219e-10	386000	44120	<1.0E-07		0.0676	0.9171
0016	160	12C1	0.0835	<1.0E-12	3.786e-10	100800	20710	<1.0E-07		0.0431	0.9431
0027	350.9	12C1	n/a	No Binding
0033	Too Low	12C1
0042	120.5	12C1		No Binding
0044	0	12C1
0040	79.5	12C1	0.0389	<1.0E-12	1.881e-10	339800	31390	<1.0E-07		0.1542	0.8882
0038	Too Low	12C1
0034	16.7	12C1	0.0469	<1.0E-12	3.65e-10	171200	120900	<1.0E-07		0.0665	0.8859
0041	Too Low	12C1
0032	Too Low	12C1
0036	9.97	12C1	0.0412	<1.0E-12	5.263e-10	142400	64330	<1.0E-07		0.076	0.8293
0048	35.5	12C1	n/a	No Binding
0057	31.6	12C1	n/a	No Binding
0058	56.7	12C1	n/a	No Binding
0059	26.9	12C1	n/a	No Binding
0052	48.3	12C1	n/a	No Binding
0060	45.9	12C1	n/a	No Binding
0056	148.7	12C1	0.0301	5.938e-06	7.341e-05	1261	15600	0.007491	0.0002574	0.0661	0.7364
0049	0	12C1
0050	50.4	12C1	n/a	No Binding
0055	0	12C1
0051	52.7	12C1	n/a	No Binding
0054	42.8	12C1	n/a	No Binding
0079	44.4	12C1	0.068	<1.0E-12	5.261e-11	510300	14180	<1.0E-07		0.1057	0.9103
0078	14.1	12C1	0.0214	<1.0E-12	2.249e-10	383000	197300	<1.0E-07		0.1522	0.8278
0080	Too Low	12C1
0096	10.9	12C1	n/a	No Binding
0095	24.8	12C1	n/a	No Binding
0103	9.88	12C1	n/a	No Binding
0094	10.3	12C1	n/a	No Binding
0107	15.9	12C1	n/a	No Binding
v1.1 Control (0001)	411	1E6	0.2837	3.395e-09	4.021e-11	1317000	14840	0.004469	1.623e-05	0.22	0.9878
v3.28 Control (0002)	134.6	1E6	0.2517	1.763e-09	3.871e-11	135000	961	0.000238	4.945e-06	0.0151	0.9985
0003	159.5	1E6	0.296	8.109e-10	8.673e-12	664100	3351	0.0005385	5.078e-06	0.0456	0.998
0004	625.5	1E6	0.2797	7.734e-09	5.737e-11	589000	4123	0.004555	1.118e-05	0.063	0.9956
0005	Too Low	1E6
0006	120	1E6	0.2947	<1.0E-12	2.97e-11	416600	9815	<1.0E-07		0.1025	0.9929
0007	198.5	1E6	0.2282	2.09e-08	2.923e-09	25260	3431	0.0005278	1.76e-05	0.066	0.9888
0008	16.1	1E6	0.2834	2.411e-09	3.901e-11	675100	8956	0.001628	1.508e-05	0.2062	0.9833
0009	22.5	1E6	0.2938	4.449e-11	1.862e-11	398500	6202	1.773e-05	7.414e-06	0.0361	0.9974
0010	276.9	1E6	0.3155	4.013e-10	9.829e-12	413100	1938	0.0001658	3.985e-06	0.0264	0.999
0014	410	1E6	0.292	2.112e-09	1.452e-11	964100	5737	0.002036	7.007e-06	0.0634	0.9959
0012	474.3	1E6	0.2698	3.516e-09	1.151e-10	1881000	58600	0.006614	6.65e-05	0.2668	0.9429
0024	145	1E6	0.3027	3.695e-10	4.166e-12	734700	2206	0.0002715	2.95e-06	0.0181	0.9993
0022	61.1	1E6	0.2838	6.012e-10	6.635e-12	498300	1665	0.0002996	3.151e-06	0.0144	0.9992
0021	104.3	1E6	0.2922	6.542e-10	9.244e-12	508900	2641	0.0003329	4.375e-06	0.0232	0.9987
0017	79.1	1E6	0.2458	4.232e-09	4.266e-11	471400	4095	0.001995	1.021e-05	0.0565	0.9935
0018	69.6	1E6	0.2796	1.036e-09	1.251e-11	538300	3075	0.0005577	5.935e-06	0.0427	0.9981
0019	121.2	1E6	0.2834	2.19e-09	1.172e-11	698800	3083	0.001531	4.641e-06	0.0538	0.9973
0015	191.7	1E6	0.3051	1.416e-09	2.236e-11	608800	6531	0.0008622	9.985e-06	0.0935	0.9942
0016	160	1E6	0.3137	6.9e-10	2.912e-11	323400	3617	0.0002231	9.081e-06	0.0711	0.994
0027	350.9	1E6	0.3652	6.993e-10	5.426e-12	1120000	5224	0.0007829	4.854e-06	0.0365	0.9981
0033	Too Low	1E6
0042	120.5	1E6	0.3045	9.762e-09	8.937e-11	194400	1515	0.001898	9.12e-06	0.062	0.9932
0044	0	1E6
0040	79.5	1E6	0.2976	6.691e-09	6.61e-11	445400	4028	0.00298	1.184e-05	0.0887	0.9939
0038	Too Low	1E6
0034	16.7	1E6	0.2535	7.858e-10	1.571e-11	948200	13290	0.0007451	1.062e-05	0.0578	0.9931
0041	Too Low	1E6
0032	Too Low	1E6
0036	9.97	1E6	0.2428	1.728e-09	3.691e-11	437200	6532	0.0007553	1.153e-05	0.0928	0.9916
0048	35.5	1E6	0.2892	<1.0E-12	1.729e-11	418400	3332	<1.0E-07		0.0956	0.9966
0057	31.6	1E6	0.2683	1.76e-11	1.439e-11	430600	4142	7.578e-06	6.197e-06	0.0364	0.9981
0058	56.7	1E6	0.2864	3.322e-10	1.297e-11	485900	3336	0.0001614	6.202e-06	0.0492	0.9972
0059	26.9	1E6	0.2648	1.385e-10	1.446e-11	365300	3688	5.058e-05	5.257e-06	0.0146	0.9987
0052	48.3	1E6	0.278	1.774e-10	6.066e-12	694500	3045	0.0001232	4.178e-06	0.0253	0.9987
0060	45.9	1E6	0.2847	2.716e-10	7.719e-12	667100	4559	0.0001812	4.998e-06	0.0171	0.9986
0056	148.7	1E6	0.3046	6.023e-10	9.752e-12	767500	5747	0.0004623	6.636e-06	0.0474	0.9971
0049	0	1E6
0050	50.4	1E6	0.2993	2.248e-10	7.266e-12	438500	1689	9.856e-05	3.163e-06	0.0146	0.9993
0055	0	1E6
0051	52.7	1E6	0.2846	1.973e-10	1.005e-11	473700	2545	9.348e-05	4.734e-06	0.0292	0.9985
0054	42.8	1E6	0.274	1.019e-10	9.871e-12	530200	2862	5.405e-05	5.226e-06	0.05	0.9974
0079	44.4	1E6	0.3317	3.965e-09	2.735e-11	524900	3206	0.002081	6.668e-06	0.0608	0.9972
0078	14.1	1E6	0.3059	1.148e-09	1.137e-11	1195000	9286	0.001372	8.414e-06	0.1256	0.9932
0080	Too Low	1E6
0096	10.9	1E6	0.3205	<1.0E-12	8.529e-12	706400	4452	<1.0E-07		0.0784	0.9976
0095	24.8	1E6	0.2948	<1.0E-12	1.806e-11	490800	5134	<1.0E-07		0.1181	0.9946
0103	9.88	1E6	0.2956	<1.0E-12	8.429e-12	768800	5382	<1.0E-07		0.1408	0.9959
0094	10.3	1E6	0.2646	<1.0E-12	1.16e-11	717800	8715	<1.0E-07		0.0501	0.996
0107	15.9	1E6	0.297	1.71e-10	6.127e-12	816200	4388	0.0001395	4.944e-06	0.0986	0.9969
v1.1 Control (0001)	411	1A12	0.2969	<1.0E-12	1.871e-11	575800	7078	<1.0E-07		0.1439	0.9932
v3.28 Control (0002)	134.6	1A12	0.095	6.594e-08	1.541e-09	108900	2500	0.007179	3.101e-05	0.0075	0.9924
0003	159.5	1A12	0.2786	<1.0E-12	1.908e-11	380500	2890	<1.0E-07		0.1089	0.9955
0004	625.5	1A12	0.2777	3.512e-09	2.04e-11	549200	2720	0.001929	5.85e-06	0.0405	0.9974
0005	Too Low	1A12
0006	120	1A12	0.0098	2.111e-06	1.419e-05	4804	32300	0.01014	0.0005919	0.0114	0.4896
0007	198.5	1A12	0.1431	3.636e-08	4.014e-09	21020	2234	0.0007642	2.281e-05	0.0818	0.9803
0008	16.1	1A12	0.2089	8.505e-10	1.061e-10	168300	5145	0.0001432	1.731e-05	0.1575	0.9867
0009	22.5	1A12	0.0684	9.626e-08	5.62e-09	202900	11590	0.01953	0.0002363	0.0084	0.9811
0010	276.9	1A12	0.1325	1.27e-07	3.749e-08	6727	1983	0.0008541	1.485e-05	0.0281	0.9916
0014	410	1A12	0.29	<1.0E-12	1.573e-11	491400	4652	<1.0E-07		0.061	0.9968
0012	474.3	1A12	0.2895	<1.0E-12	9.977e-12	565300	3601	<1.0E-07		0.0467	0.9978
0024	145	1A12	0.2052	1.831e-08	2.532e-10	441800	5841	0.008089	3.281e-05	0.057	0.9905
0022	61.1	1A12	0.243	1.179e-09	4.565e-11	189300	2587	0.0002232	8.085e-06	0.0367	0.9968
0021	104.3	1A12	0.2259	2.263e-08	2.546e-10	313000	3360	0.007083	2.378e-05	0.0483	0.9931
0017	79.1	1A12	0.2316	<1.0E-12	2.572e-11	246400	1973	<1.0E-07		0.0402	0.9976
0018	69.6	1A12	0.2582	4.519e-11	1.384e-11	300400	2182	1.358e-05	4.157e-06	0.006	0.9994
0019	121.2	1A12	0.2596	<1.0E-12	1.103e-11	445400	2268	<1.0E-07		0.049	0.9981
0015	191.7	1A12	0.2699	<1.0E-12	2.244e-11	368100	4542	<1.0E-07		0.0513	0.9967
0016	160	1A12	0.2703	<1.0E-12	1.544e-11	246100	1000	<1.0E-07		0.0189	0.9989
0027	350.9	1A12	0.3652	6.993e-10	5.426e-12	1120000	5224	0.0007829	4.854e-06	0.0365	0.9981
0033	Too Low	1A12
0042	120.5	1A12	0.247	3.011e-09	1.272e-10	101400	1494	0.0003054	1.21e-05	0.124	0.9915
0044	0	1A12
0040	79.5	1A12	0.2841	<1.0E-12	5.194e-11	240100	5948	<1.0E-07		0.0845	0.993
0038	Too Low	1A12
0034	16.7	1A12	0.23	1.085e-09	4.963e-11	226900	2618	0.0002463	1.09e-05	0.0987	0.9909
0041	Too Low	1A12
0032	Too Low	1A12
0036	9.97	1A12	0.163	2.018e-09	1.319e-10	130900	3491	0.0002642	1.576e-05	0.0373	0.9912
0048	35.5	1A12	0.0163	1.23e-06	1.331e-06	28550	30850	0.03513	0.001852	0.006	0.8575
0057	31.6	1A12	0.1046	6.98e-08	1.816e-09	173700	4393	0.01213	7.417e-05	0.018	0.9879
0058	56.7	1A12	0.1745	3.08e-08	9.462e-10	390800	11450	0.01204	0.0001115	0.1074	0.9704
0059	26.9	1A12	0.0492	7.241e-06	3.481e-05	2858	13740	0.02069	0.0005025	0.0154	0.9424
0052	48.3	1A12	0.0503	1.809e-07	1.37e-08	184300	13480	0.03334	0.000654	0.0114	0.9686
0060	45.9	1A12	0.0444	3.751e-07	5.055e-08	92530	12320	0.03471	0.0007268	0.0119	0.9609
0056	148.7	1A12	0.2505	8.75e-09	1.09e-10	455000	5351	0.003981	1.629e-05	0.046	0.9913
0049	0	1A12
0050	50.4	1A12	0.0356	1.835e-07	1.513e-08	119200	9541	0.02187	0.0004314	0.0058	0.9575
0055	0	1A12
0051	52.7	1A12	0.0099	1.811e-07	<1.0E-12	175100	1.035e-64	0.03171	<1.0E-07	0.0044	0.7524
0054	42.8	1A12	0.0279	5.095e-07	8.033e+60	85410	6.113e+71	0.04352	6.113e+65	0.0061	0.9399
0079	44.4	1A12	0.3066	7.436e-10	3.567e-12	1055000	3068	0.0007845	2.994e-06	0.0199	0.9991
0078	14.1	1A12	0.2496	6.859e-10	2.56e-11	374400	3556	0.0002568	9.271e-06	0.1181	0.9932
0080	Too Low	1A12
0096	10.9	1A12	0.0539	3.316e-08	2.567e-09	394000	29150	0.01306	0.0002977	0.0253	0.9045
0095	24.8	1A12	0.1009	3.621e-08	1.74e-09	271400	12400	0.009828	0.0001455	0.0682	0.9323
0103	9.88	1A12	0.0696	2.955e-08	2.132e-09	559600	38420	0.01654	0.0003676	0.0291	0.9272
0094	10.3	1A12	0.0659	2.956e-08	2.264e-09	474200	34610	0.01402	0.0003259	0.0315	0.9089
0107	15.9	1A12	0.0894	1.415e-07	1.084e-08	74870	5673	0.0106	0.0001159	0.0327	0.9641
v1.1 Control (0001)	411	4B3	0.2805	1.335e-09	1.099e-11	767900	4962	0.001025	5.227e-06	0.0293	0.998
v3.28 Control (0002)	134.6	4B3	0.2311	5.149e-09	1.209e-10	105300	1619	0.0005424	9.63e-06	0.0368	0.9958
0003	159.5	4B3	0.2792	2.412e-09	1.401e-11	497600	2148	0.0012	4.667e-06	0.0359	0.998
0004	625.5	4B3	0.2946	1.438e-09	7.823e-12	604400	2115	0.0008692	3.621e-06	0.0289	0.9986
0005	Too Low	4B3
0006	120	4B3	0.2665	5.492e-09	6.875e-11	284700	2962	0.001563	1.089e-05	0.0963	0.9929
0007	198.5	4B3	0.2562	1.724e-09	2.023e-11	413400	2828	0.0007129	6.793e-06	0.0481	0.9964
0008	16.1	4B3	0.2801	2.36e-09	3.37e-11	474500	4949	0.00112	1.093e-05	0.0942	0.9909
0009	22.5	4B3	0.2871	2.758e-09	1.031e-10	224700	7514	0.0006198	1.034e-05	0.0396	0.9955
0010	276.9	4B3	0.3176	2.185e-09	1.049e-11	552700	1978	0.001208	3.863e-06	0.0353	0.9988
0014	410	4B3	0.2723	1.572e-09	8.939e-12	736500	3129	0.001158	4.377e-06	0.0452	0.9979
0012	474.3	4B3	0.2824	1.391e-09	5.334e-12	906000	2708	0.00126	3.026e-06	0.0262	0.9987
0024	145	4B3	0.3005	1.48e-09	1.044e-11	655000	3126	0.0009692	5.035e-06	0.0606	0.9978
0022	61.1	4B3	0.2835	1.767e-09	8.483e-12	473200	1419	0.000836	3.135e-06	0.0207	0.9993
0021	104.3	4B3	0.3129	1.825e-09	1.332e-11	460100	2248	0.0008399	4.551e-06	0.0373	0.9985
0017	79.1	4B3	0.2504	2.975e-09	2.572e-11	324100	1985	0.0009643	5.884e-06	0.0267	0.9977
0018	69.6	4B3	0.2666	2.36e-09	1.749e-11	426800	2194	0.001007	5.376e-06	0.0203	0.9983
0019	121.2	4B3	0.2785	5.528e-09	3.194e-11	224400	1036	0.001241	4.309e-06	0.0198	0.9989
0015	191.7	4B3	0.2559	3.574e-09	6.829e-11	359700	5968	0.001286	1.218e-05	0.0595	0.9921
0016	160	4B3	0.2688	4.743e-09	3.047e-11	276800	1375	0.001313	5.35e-06	0.0263	0.9978
0027	350.9	4B3	0.3066	7.436e-10	3.567e-12	1055000	3068	0.0007845	2.994e-06	0.0199	0.9991
0033	Too Low	4B3
0042	120.5	4B3	0.3001	5.088e-09	2.997e-10	95770	4864	0.0004872	1.453e-05	0.0453	0.9904
0044	0	4B3
0040	79.5	4B3	0.3081	1.392e-09	2.473e-11	452000	4817	0.0006293	8.946e-06	0.0639	0.9962
0038	Too Low	4B3
0034	16.7	4B3	0.2652	1.272e-09	1.893e-11	700000	7269	0.0008904	9.496e-06	0.0728	0.994
0041	Too Low	4B3
0032	Too Low	4B3
0036	9.97	4B3	0.2482	2.318e-09	2.982e-11	424900	3797	0.000985	9.113e-06	0.0895	0.9945
0048	35.5	4B3	0.255	4.136e-09	1.054e-10	224700	4338	0.0009293	1.546e-05	0.1084	0.9873
0057	31.6	4B3	0.2755	1.767e-09	2.794e-11	362100	3294	0.0006399	8.276e-06	0.063	0.9959
0058	56.7	4B3	0.2607	2.156e-09	3.19e-11	322400	3081	0.0006951	7.851e-06	0.0446	0.9965
0059	26.9	4B3	0.2412	5.059e-09	1.033e-10	212000	3716	0.001073	1.124e-05	0.0584	0.9943
0052	48.3	4B3	0.2536	3.893e-09	2.772e-11	404100	2466	0.001573	5.772e-06	0.0119	0.9981
0060	45.9	4B3	0.2699	4.771e-09	5.222e-11	327400	3176	0.001562	7.919e-06	0.0234	0.9967
0056	148.7	4B3	0.3056	1.531e-09	9.556e-12	556300	2205	0.0008517	4.107e-06	0.0431	0.9985
0049	0	4B3
0050	50.4	4B3	0.2666	2.009e-09	1.244e-11	498500	2125	0.001002	4.496e-06	0.0308	0.9983
0055	0	4B3
0051	52.7	4B3	0.2412	4.562e-09	3.99e-11	284200	1931	0.001296	7.141e-06	0.0355	0.9968
0054	42.8	4B3	0.2489	4.262e-09	3.336e-11	316600	1958	0.001349	6.473e-06	0.0287	0.9976
0079	44.4	4B3	0.2969	3.19e-09	9.428e-12	426400	980	0.00136	2.527e-06	0.0143	0.9995
0078	14.1	4B3	0.2724	1.295e-09	1.569e-11	901300	8419	0.001167	9.006e-06	0.1186	0.9935
0080	Too Low	4B3
0096	10.9	4B3	0.2737	9.985e-10	1.367e-11	612100	4290	0.0006111	7.185e-06	0.0895	0.9958
0095	24.8	4B3	0.2896	1.602e-09	3.114e-11	394300	4764	0.0006316	9.62e-06	0.1056	0.994
0103	9.88	4B3	0.272	1.043e-09	1.808e-11	635600	6062	0.0006631	9.593e-06	0.1388	0.9891
0094	10.3	4B3	0.2683	9.401e-10	1.422e-11	621500	4741	0.0005843	7.632e-06	0.1211	0.9954
0107	15.9	4B3	0.2902	1.008e-09	8.707e-12	675600	3301	0.0006813	4.85e-06	0.0708	0.9975
